# Supplementary material for: Effective End-Group Modification of Star-Shaped PNVCL from Xanthate to Trithiocarbonate Avoiding Chemical Crosslinking
Source: MDPI journal article supplement (doi:10.3390/polym13213677), 2021-10-25
Supplement: s1 [file s1]

Article

# Effective End-Group Modification of Star-Shaped PNVCL from Xanthate to Trithiocarbonate Avoiding Chemical Crosslinking

Norma A. Cortez-Lemus \*, Eduardo Hermosillo-Ochoa and Ángel Licea-Claverie

Centro de Graduados e Investigación en Química, Tecnológico Nacional de México/Instituto Tecnológico de Tijuana, A. P. 1166., Tijuana 22000, Mexico; eduardo.hermosillo17@tectijuana.edu.mx (E.H.-O.); aliceac@tectijuana.mx (Á.L.-C.)

\* Correspondence: ncortez@tectijuana.mx

**Table S1.** Characteristics of PNVCL star polymers prepared in this work.

| Entry | Sample <sup>a</sup>                 | [NVCL] <sub>0</sub> :<br>[CTA] <sub>0</sub> | Time (h) | Conv. <sup>b</sup><br>(%) | $M_{n\ theo}^c$<br>(g/mol) | $M_{n\ GPC}^d$<br>(g/mol) | $\bar{D}^d$ | LCST <sup>e</sup> | (PNVCL-SH) <sub>6</sub>   |             |
|-------|-------------------------------------|---------------------------------------------|----------|---------------------------|----------------------------|---------------------------|-------------|-------------------|---------------------------|-------------|
|       |                                     |                                             |          |                           |                            |                           |             |                   | $M_{n\ GPC}^d$<br>(g/mol) | $\bar{D}^d$ |
| 1     | (PNVCL <sub>48</sub> ) <sub>6</sub> | 430                                         | 24       | 64                        | 39,565                     | 39,610                    | 1.15        | -                 | 47,260                    | 1.07        |
| 2     | (PNVCL <sub>32</sub> ) <sub>6</sub> | 430                                         | 18       | -                         | -                          | 26,900                    | 1.13        | 30                | 27,500                    | 1.2         |
| 3     | (PNVCL <sub>55</sub> ) <sub>6</sub> | 480                                         | 18       | 55                        | 38,000                     | 46,100                    | 1.11        | 36                | -                         | -           |
| 4     | (PNVCL <sub>35</sub> ) <sub>6</sub> | 430                                         | 20       | 54                        | 34,188                     | 29,200                    | 1.24        | 28                | 43,560                    | 1.22        |
| 5     | (PNVCL <sub>25</sub> ) <sub>6</sub> | 430                                         | 16       | 42                        | 26,415                     | 21,100                    | 1.09        | 24                | -                         | -           |

The polymerization reaction was carried out in *p*-dioxane at 30 °C in the presence of hexafunctional xanthate-type. <sup>a</sup>The subscript numbers represent the repeating units of PNVCL estimated by using GPC. <sup>b</sup>Determined gravimetrically. <sup>c</sup>Calculated using equation:  $M_{n\ theo} = M_{CTA} + \text{conv.} (M_{NVCL}[NVCL]_0/[CTA]_0)$ . <sup>d</sup>Determined by GPC in THF at 35 °C with RI and LS detectors using polystyrene linear standards for calibration of LS detector. PNVCL  $dn/dc = 0.109$  mL/g. <sup>e</sup>Determined by DLS in aqueous water (1 mg/mL).

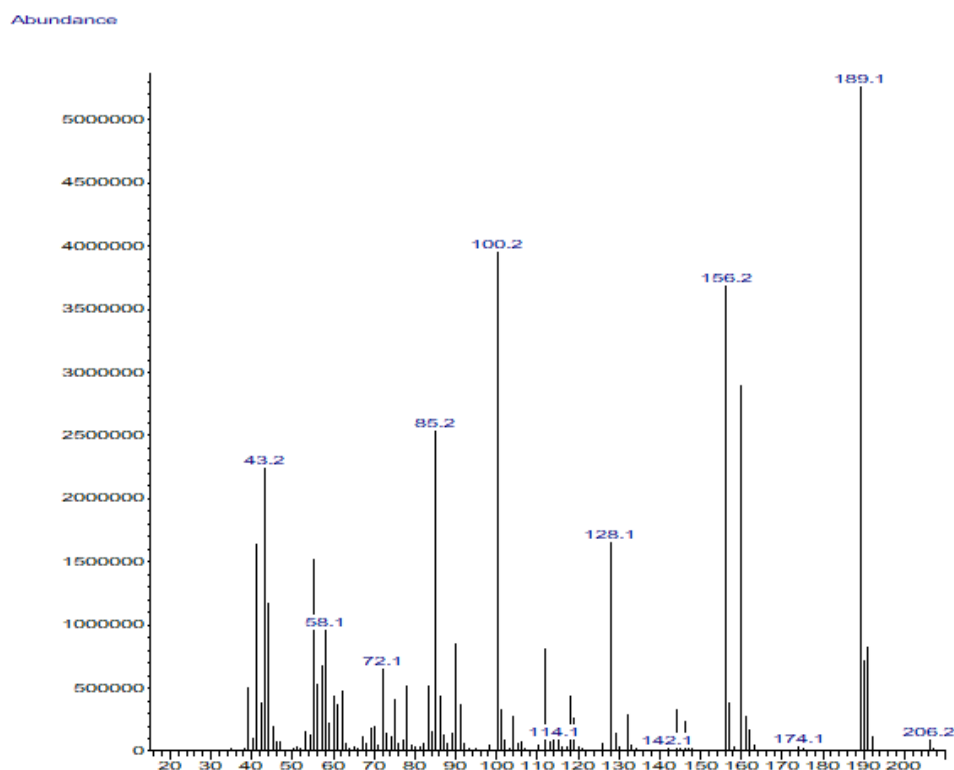

**Figure S1.** Mass spectrum for the *o*-ethyl hexylcarbamothioate.

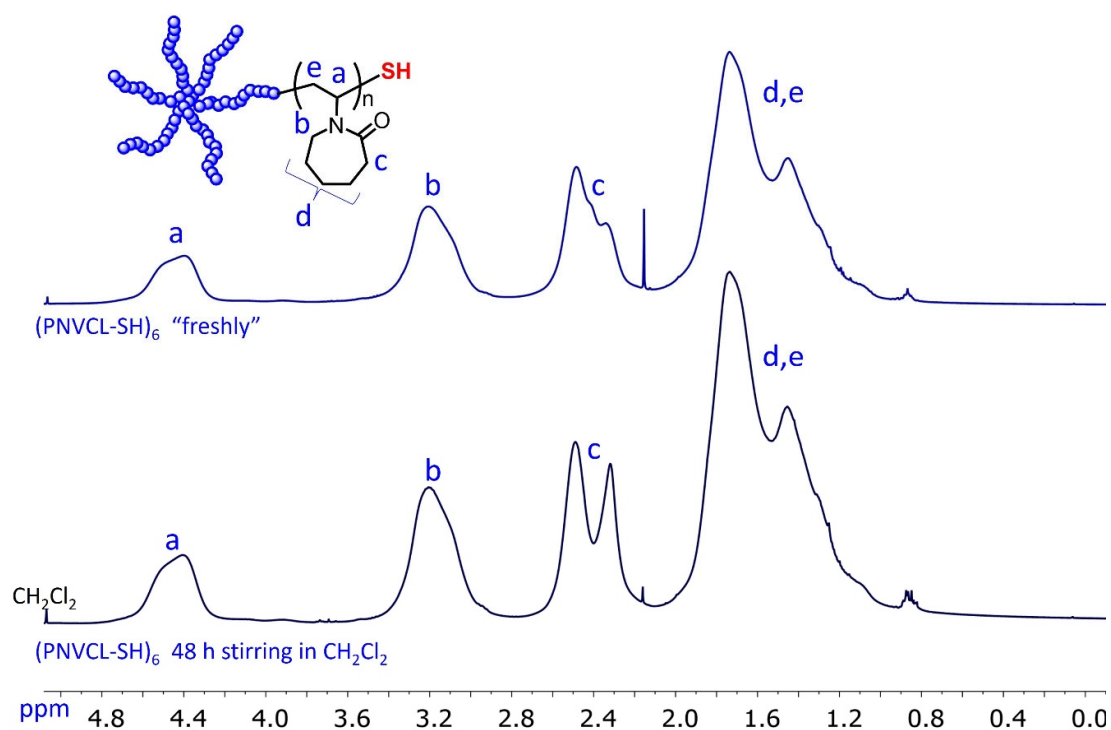

Figure S2.  $^1\text{H}$ -NMR (400 MHz,  $\text{CDCl}_3$ ) spectrum of freshly  $(\text{PNVCL})_6$ -SH star polymers.

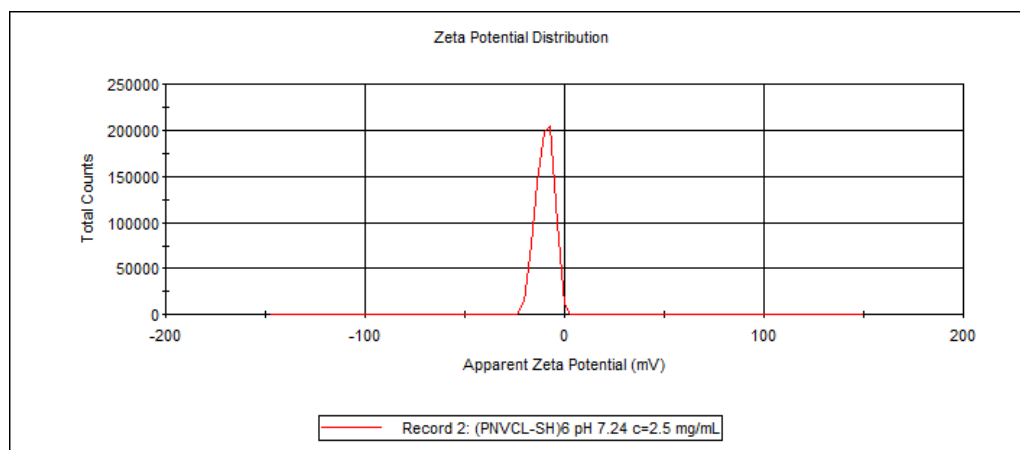

(a)

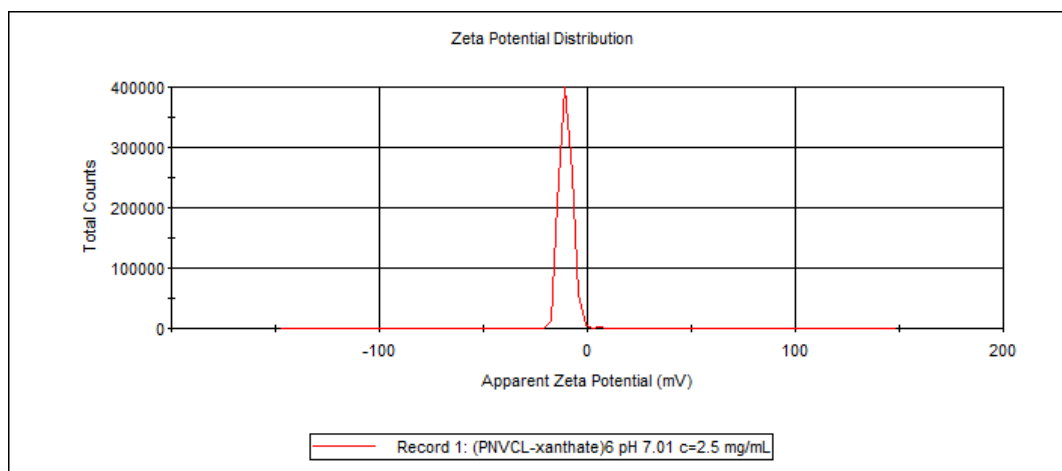

(b)

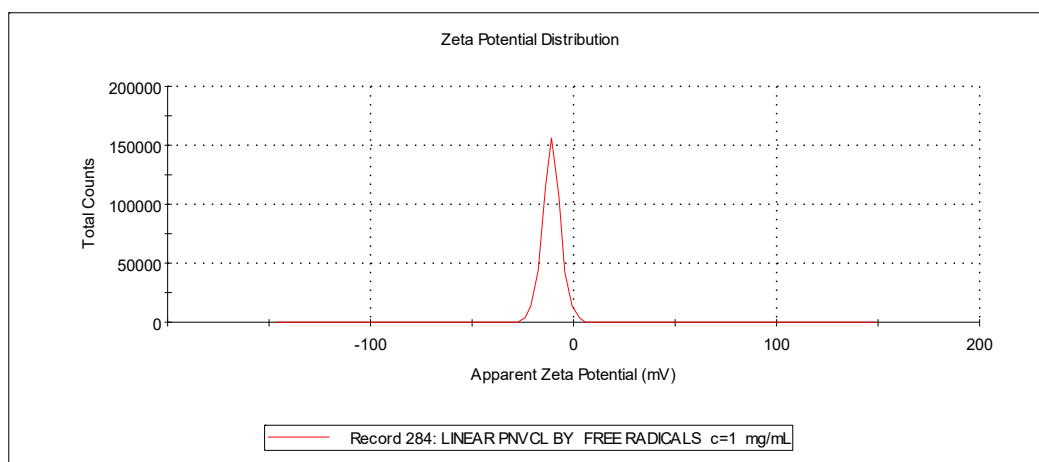

(c)

**Figure S3.** Zeta potential value using DLS for a) (PNVCL-SH)<sub>6</sub> star polymer and b) (PNVCL<sub>35</sub>-xanthate)<sub>6</sub>. The samples were dissolved in distilled water (2.5 mg/mL). The pH (unadjusted) of the solution was 7.01 and 7.24 respectively. c) Linear PNVCL polymer prepared by free radical polymerization.
